# Supplementary material
Source: Royal Society of Chemistry journal article supplement (doi:10.1039/d6nj00278a)
Supplement: d6nj00278a1.pdf [file d6nj00278a1.pdf]

***Supporting Information for:***

**SiO<sub>2</sub>-PDA-DDTC nanocomposite for efficient and selective recovery of silver  
from wastewater: Performance and mechanisms**

Xiaoping Huang<sup>1,2\*</sup>, Jihui Luo<sup>1,2</sup>, Shuangfei Sun<sup>1,2</sup>, Jianxian Zeng<sup>1,2\*</sup>

<sup>1</sup> School of Chemistry and Chemical Engineering, Hunan University of Science and Technology,

Xiangtan 411201, Hunan, China; <sup>2</sup> Key Laboratory of Theoretical Organic Chemistry and Functional

Molecule, Ministry of Education, Xiangtan 411201, Hunan, China;

Corresponding author. Tel.: +86 731 58290045, E-mail addresses: huangxp@hnust.edu.cn (Xiaoping Huang), zengjianxian@163.com (Jianxian Zeng)

First Author

Name: Xiaoping Huang

Email: huangxp@hnust.edu.cn

Corresponding Author 1

Name: Xiaoping Huang

Email: huangxp@hnust.edu.cn

Tel./fax: (+86) 731 58290045.

Corresponding Author 2

Name: Jianxian Zeng

Email: zengjianxian@163.com

## 1 The method to measure the concentration of $\text{Ag}^+$ ions in aqueous solution by UV/Vis spectroscopy

The standard solutions of  $\text{Ag}^+$  ions with varying concentrations were added to a 25 mL colorimetric tube which containing 2 ml of  $1.0 \times 10^{-4}$  mol/L tannic acid solution. Subsequently, 1ml of 1.0 mol/L NaOH solution was introduced to adjust the solution pH value to greater than 9. After it was stand for 30 minutes, the concentration of  $\text{Ag}^+$  ions in the solution was measured using a UV-vis spectrophotometer (UV-2600, Shimadzu, Japan) at the characteristic wavelength of 415 nm. The linear relationship of the concentration of  $\text{Ag}^+$  ions and absorbance is presented in Fig. S1. It indicated that the correlation coefficient ( $R^2$ ) was 0.9995, suggesting that the method is suitable for determining of the concentration of  $\text{Ag}^+$  ions.

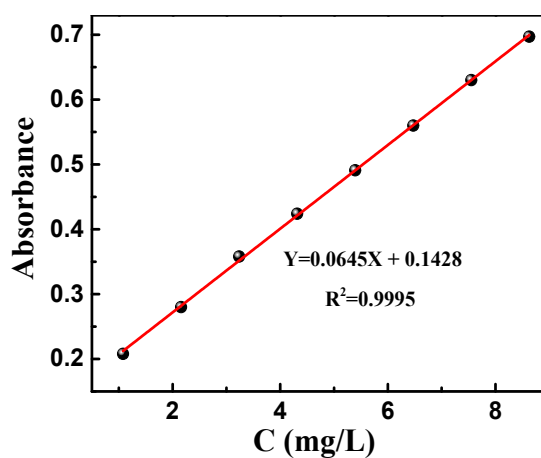

Fig. S1 Linear relationship of the  $\text{Ag}^+$  ions concentration vs. absorbance.

## 2 Batch adsorption experiment

Table S1

The parameters of kinetic models for various temperatures.

| T(°C) | $q_{e,exp}$ (mg/g) | Pseudo-first-order model |                            |                | Pseudo-second-order model |                                                |                |
|-------|--------------------|--------------------------|----------------------------|----------------|---------------------------|------------------------------------------------|----------------|
|       |                    | $q_{e,cal}$ (mg/g)       | $k_1$ (min <sup>-1</sup> ) | R <sup>2</sup> | $q_{e,cal}$ (mg/g)        | $k_2$ (mg·g <sup>-1</sup> ·min <sup>-1</sup> ) | R <sup>2</sup> |
| 20    | 97.12              | 5.707                    | 0.020                      | 0.885          | 96.339                    | 0.020                                          | 0.999          |
| 25    | 100.80             | 6.575                    | 0.014                      | 0.978          | 99.108                    | 0.017                                          | 0.999          |
| 35    | 105.67             | 8.312                    | 0.013                      | 0.894          | 103.093                   | 0.016                                          | 0.999          |

Table S2

The parameters of intraparticle diffusion model for various temperatures.

| T(°C) | Stage I   |              |                | Stage II  |              |                |
|-------|-----------|--------------|----------------|-----------|--------------|----------------|
|       | $K_{i,1}$ | $C_1$ (mg/g) | R <sup>2</sup> | $K_{i,2}$ | $C_3$ (mg/g) | R <sup>2</sup> |
| 20    | 1.062     | 88.451       | 0.996          | 0.229     | 93.725       | 0.993          |
| 25    | 0.712     | 92.673       | 0.997          | 0.478     | 94.266       | 0.967          |
| 35    | 1.124     | 94.236       | 0.996          | 0.387     | 98.938       | 0.954          |

Table S3

The parameters of Langmuir and Freundlich models at different temperature.

| T(°C) | Langmuir model |              |                | Freundlich model |       |                |
|-------|----------------|--------------|----------------|------------------|-------|----------------|
|       | $K_L$ (L/mg)   | $Q_m$ (mg/g) | R <sup>2</sup> | $K_F$ (mg/g)     | n     | R <sup>2</sup> |
| 20    | 1.138          | 119.904      | 0.985          | 8.202            | 2.426 | 0.824          |
| 25    | 1.165          | 124.533      | 0.987          | 9.021            | 2.480 | 0.821          |
| 35    | 1.197          | 130.719      | 0.992          | 10.490           | 2.589 | 0.838          |

Table S4

Thermodynamics parameters for adsorption.

| $\Delta H$ (kJ·mol <sup>-1</sup> ) | $\Delta S$ (J·mol <sup>-1</sup> ·K <sup>-1</sup> ) | $\Delta G$ (kJ·mol <sup>-1</sup> ) |        |        |
|------------------------------------|----------------------------------------------------|------------------------------------|--------|--------|
|                                    |                                                    | 293K                               | 298K   | 308K   |
| 2.482                              | 9.564                                              | -0.321                             | -0.369 | -0.465 |

### 3 Adsorption selectivity of SiO<sub>2</sub>-PDA-DDTC nanoparticles

Table S5 The adsorption of SiO<sub>2</sub>-PDA-DDTC nanoparticles on metal ions from their mixed solutions.

| Metal ions       | C <sub>0</sub><br>(mg/L) | C <sub>e</sub><br>(mg/L) | Q <sub>e</sub><br>(mg/g) | K <sub>D</sub><br>(L/g) | K      |
|------------------|--------------------------|--------------------------|--------------------------|-------------------------|--------|
| Ag <sup>+</sup>  | 216                      | 54.52                    | 96.89                    | 1.777                   | 1.00   |
| Pb <sup>2+</sup> | 414                      | 411.54                   | 5.35                     | 0.013                   | 136.69 |
| Cu <sup>2+</sup> | 128                      | 124.80                   | 1.56                     | 0.0125                  | 142.16 |
| Co <sup>2+</sup> | 120                      | 111.25                   | 0.89                     | 0.008                   | 222.13 |
| Ni <sup>2+</sup> | 120                      | 110.00                   | 0.55                     | 0.005                   | 355.40 |
| Zn <sup>2+</sup> | 130                      | 120.00                   | 0.36                     | 0.003                   | 592.33 |
| Mn <sup>2+</sup> | 110                      | 108.70                   | 0.25                     | 0.0023                  | 772.61 |
| Na <sup>+</sup>  | 46                       | 45.45                    | 0.10                     | 0.0022                  | 807.73 |

#### 4 Element concentration of SiO<sub>2</sub>-PDA-DDTC nanoparticles before and after treatment with Ag<sup>+</sup> ions

Table S6 Element concentration (%) of SiO<sub>2</sub>-PDA-DDTC nanoparticles before and after treatment with Ag<sup>+</sup> ions which determined by XPS

| Species                                        | C 1s  | O 1s  | N 1s | Si 2p | S 2p | Ag 3d |
|------------------------------------------------|-------|-------|------|-------|------|-------|
| SiO <sub>2</sub> -PDA-DDTC nanoparticles       | 26.67 | 46.79 | 4.19 | 18.96 | 3.39 | -     |
| SiO <sub>2</sub> -PDA-DDTC nanoparticles-Ag(I) | 33.51 | 37.08 | 4.50 | 15.50 | 5.29 | 4.10  |
